# Supplementary material for: Targeting CXCR4 abrogates resistance to trastuzumab by blocking cell cycle progression and synergizes with docetaxel in breast cancer treatment
Source: Research Square preprint supplement (doi:10.21203/rs.3.rs-2388864/v1), 2023-02-14
Supplement: Supplementary file 1 [file 0fe5a503ae4e6004bee4d3b9.docx]

| AMD3100 (M) Docetaxel (nM) CI |
| --- |
| 0.12 3.7 0.285  0.37 3.7 0.48  1.1 3.7 0.494  3.3 3.7 0.556  10 3.7 0.575  0.12 11 0.409  0.37 11 0.516  1.1 11 0.585  3.3 11 0.605  10 11 0.633  0.12 33 0.457  0.37 33 0.498  1.1 33 0.586  3.3 33 0.609  10 33 0.642  0.12 100 0.413  0.37 100 0.432  1.1 100 0.586  3.3 100 0.619  10 100 0.64 |

Table 1. Combination index
