# Supplementary material for: Targeting CXCR4 abrogates resistance to trastuzumab by blocking cell cycle progression and synergizes with docetaxel in breast cancer treatment
Source: Research Square preprint supplement (doi:10.21203/rs.3.rs-2388864/v1), 2023-02-14
Supplement: Supplementary file 2 [file 183237f202780a93dbbcc0d7.pdf]

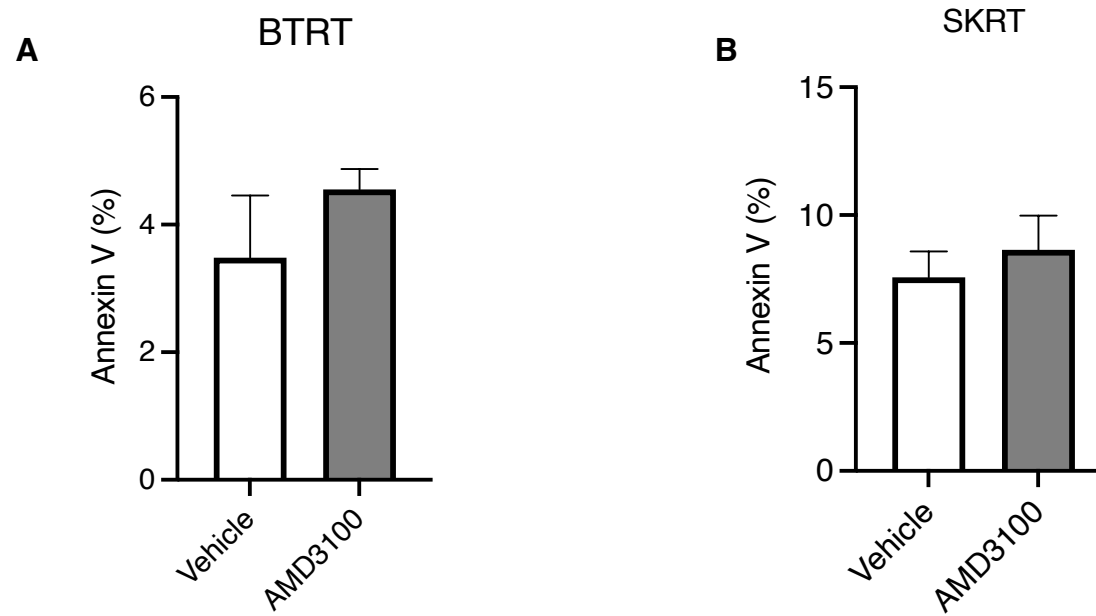

Fig. S7. **AMD3100 treatment did not induce apoptosis.** BTRT (A) or SKRT (B) were treated with AMD3100 (10  $\mu$ M) for 72 hours followed by staining with Annexin V. The annexin V positive cells were analyzed with flow cytometry.
