# Supplementary material for: Targeting CXCR4 abrogates resistance to trastuzumab by blocking cell cycle progression and synergizes with docetaxel in breast cancer treatment
Source: Research Square preprint supplement (doi:10.21203/rs.3.rs-2388864/v1), 2023-02-14
Supplement: Supplementary file 3 [file 19174182cc910805c7c06edc.pdf]

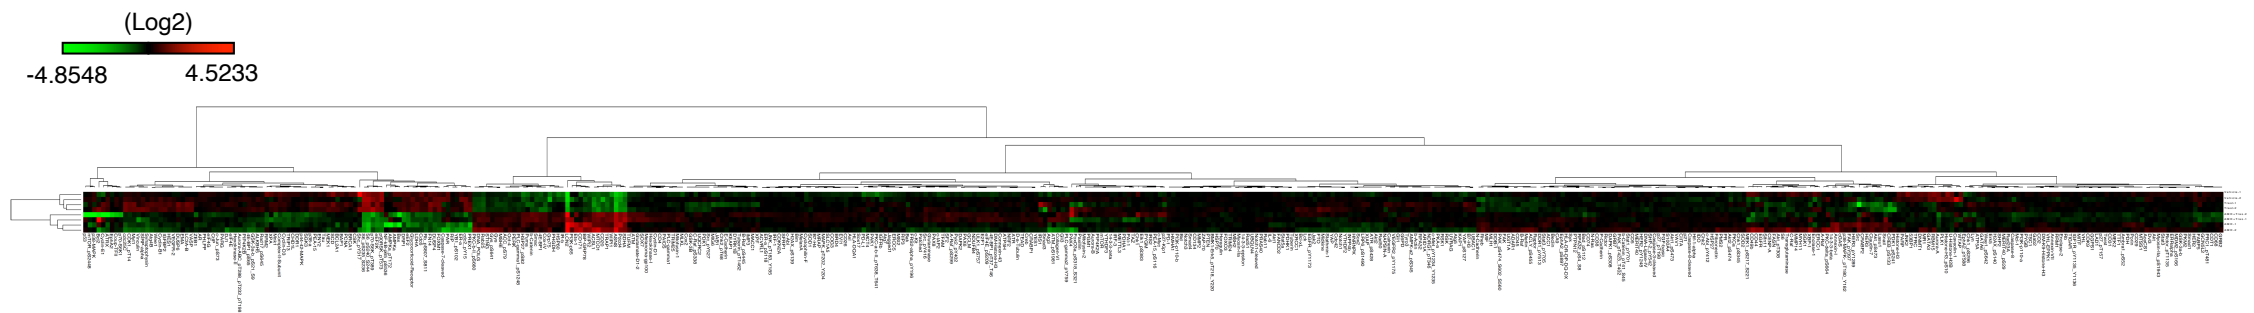

**Fig. S3. Effect of AMD3100 on cellular signaling pathways.** BTRT cells grown in 3D Matrigel culture were treated with vehicle, AMD3100 (AMD;10  $\mu$ M), trastuzumab (Trast; 20  $\mu$ g/ml), or their combination (AMD+Trast). Cell lysates were subject to RPPA (Materials and Methods, Fig. 5A). Data are presented in a matrix format: each column represents an antibody target, and each row a sample. In each sample, the ratio of the abundance of the molecule to its median abundance across all samples is represented by the color of the corresponding cell in the matrix (see the scale for expression levels).
