# Supplementary material for: Targeting CXCR4 abrogates resistance to trastuzumab by blocking cell cycle progression and synergizes with docetaxel in breast cancer treatment
Source: Research Square preprint supplement (doi:10.21203/rs.3.rs-2388864/v1), 2023-02-14
Supplement: Supplementary file 4 [file 31175cf457de476d23f3f483.pdf]

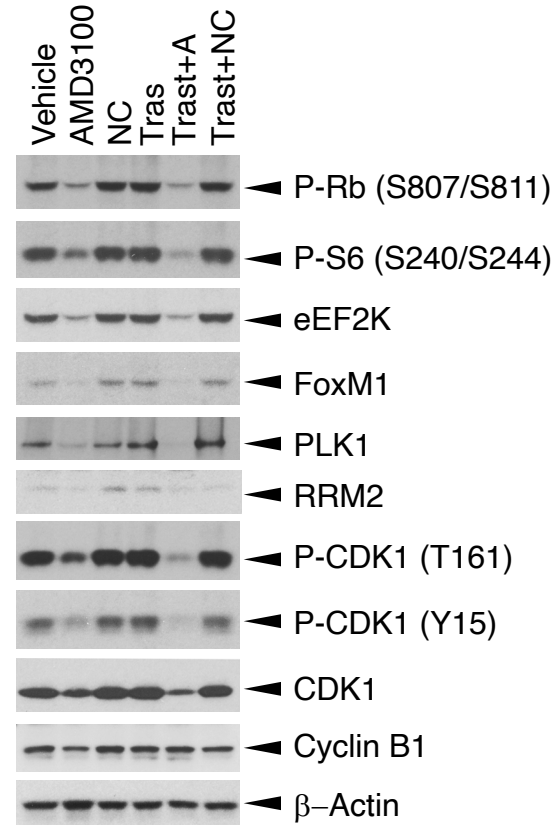

**Fig. S5. Western Blot.** BTRT cells grown in 3D Matrigel culture were treated with vehicle, AMD3100 (10μM), trastuzumab (20 μg/ml), or their combination. A polypeptide that was designed as a CXCR4 antagonist but did not show biological function in the HER2+ breast cancer cells was used as a negative control (NC).
