# Supplementary material for: Targeting CXCR4 abrogates resistance to trastuzumab by blocking cell cycle progression and synergizes with docetaxel in breast cancer treatment
Source: Research Square preprint supplement (doi:10.21203/rs.3.rs-2388864/v1), 2023-02-14
Supplement: Supplementary file 5 [file 7a70913ded9f19b3b03e7737.pdf]

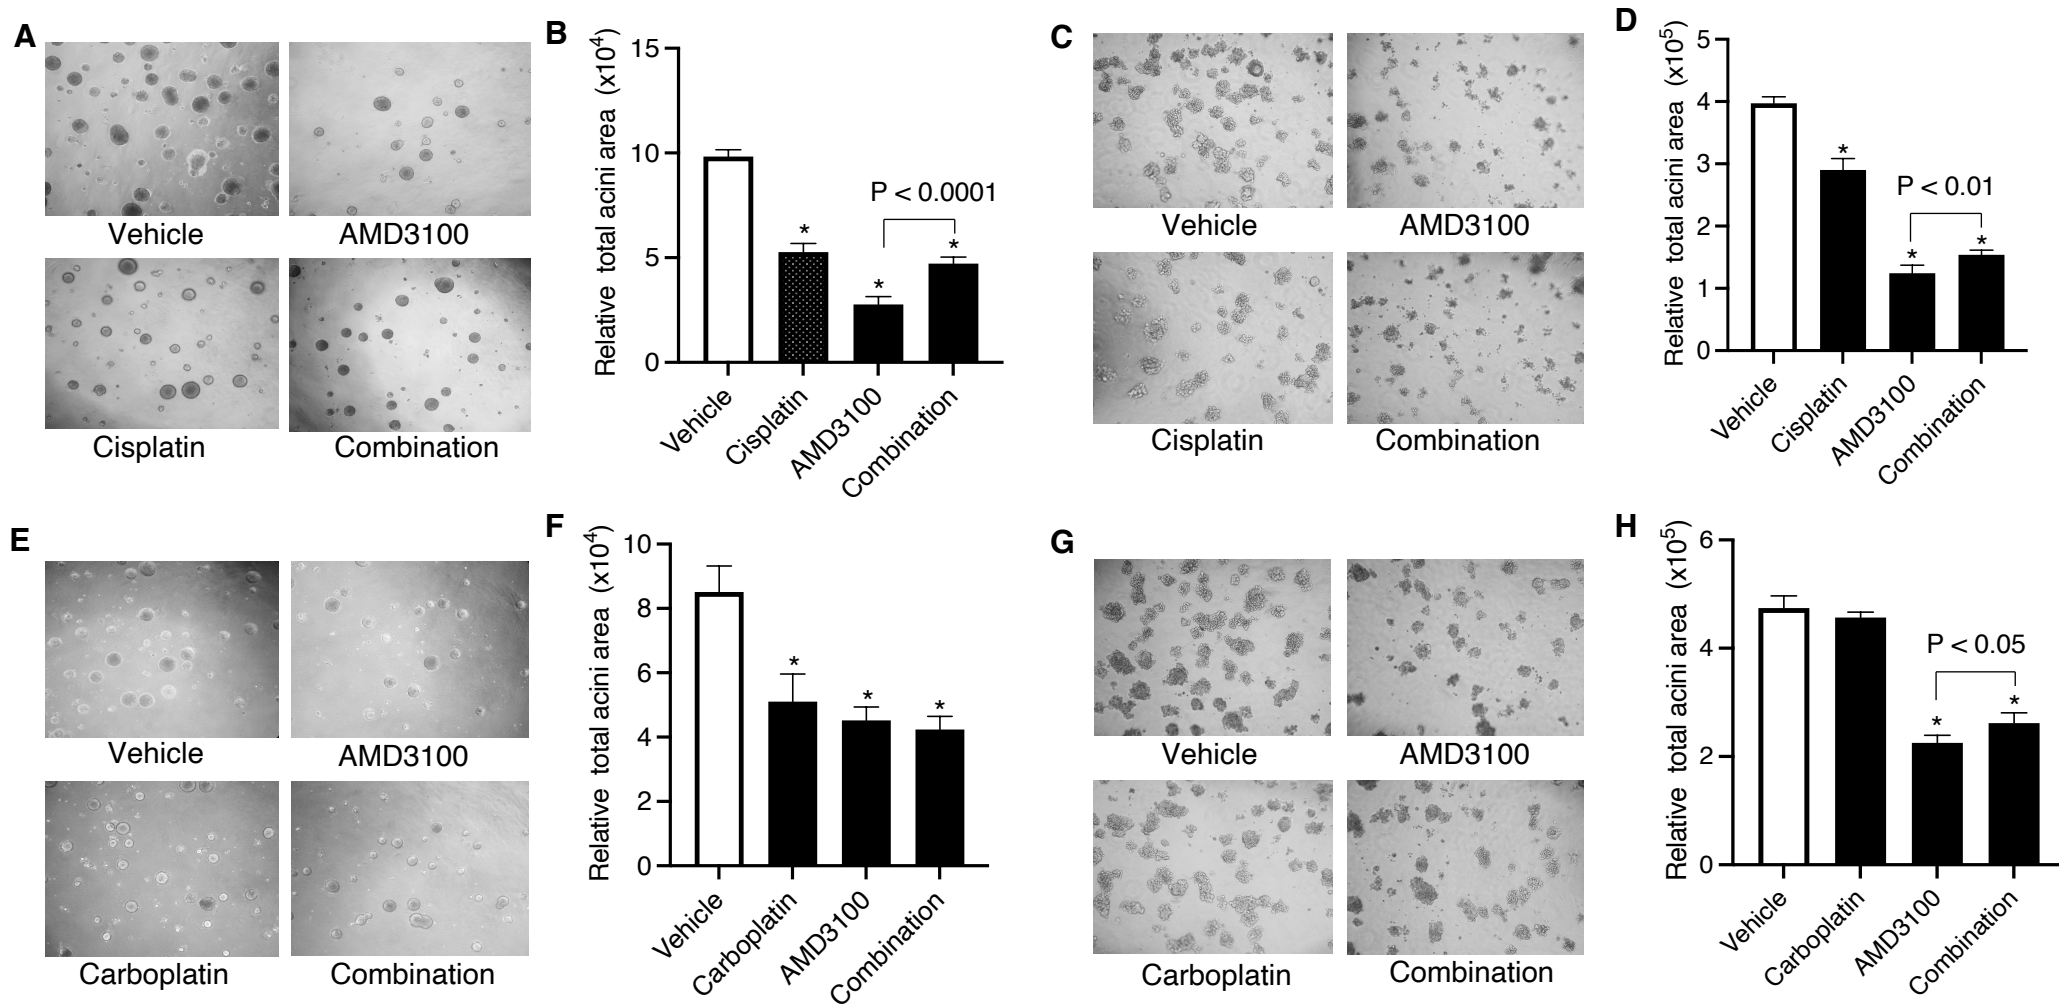

**Fig. S8. Effect of combination of AMD3100 and Cisplatin or carboplatin on trastuzumab-resistant breast cancer cell growth.** BTRT (A, E) or SKRT cells (C, G) were grown in 3D Matrigel culture and treated with AMD3100 (5  $\mu$ M)/Cisplatin (10  $\mu$ M) (A, C), or AMD3100 (5  $\mu$ M)/Carboplatin (10  $\mu$ M) (E, G). Photographs were taken on day 11. Quantitative analysis of the total acini area was performed using AlphaView SA, and the data were analyzed using one-way ANOVA (B, D, F, H: \*, P < 0.0001 vs. Vehicle).
