# Supplementary material for: Targeting CXCR4 abrogates resistance to trastuzumab by blocking cell cycle progression and synergizes with docetaxel in breast cancer treatment
Source: Research Square preprint supplement (doi:10.21203/rs.3.rs-2388864/v1), 2023-02-14
Supplement: Supplementary file [file 02e4ad564d012f9ce6ab1ab8.pdf]

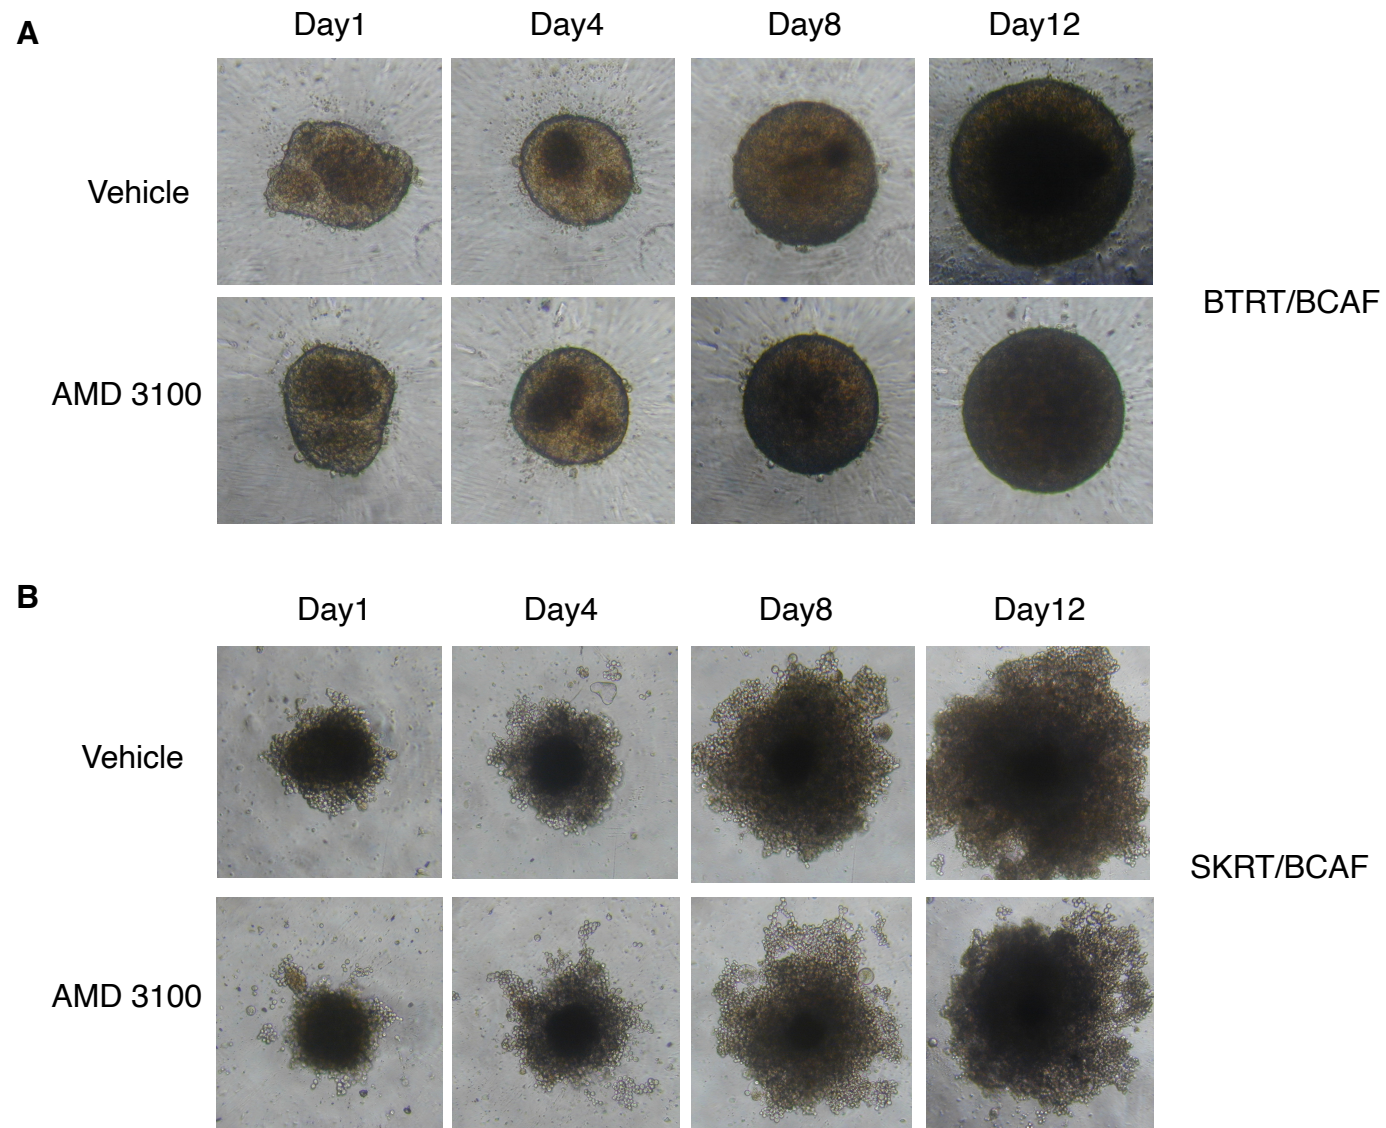

Fig. S2. **Effect of AMD3100 on cell growth in 3D coculture.** BTRT (A) or SKRT (B) were cocultured with BCAFs in 96 well “U” bottom unattached plates and treated with AMD3100 (2.5  $\mu$ M) (Material and Methods). The dynamic change of the spheres was monitored and photographed.
