# Supplementary material for: Targeting CXCR4 abrogates resistance to trastuzumab by blocking cell cycle progression and synergizes with docetaxel in breast cancer treatment
Source: Research Square preprint supplement (doi:10.21203/rs.3.rs-2388864/v1), 2023-02-14
Supplement: Supplementary file [file cfddde5da36929dfc2c67e27.pdf]

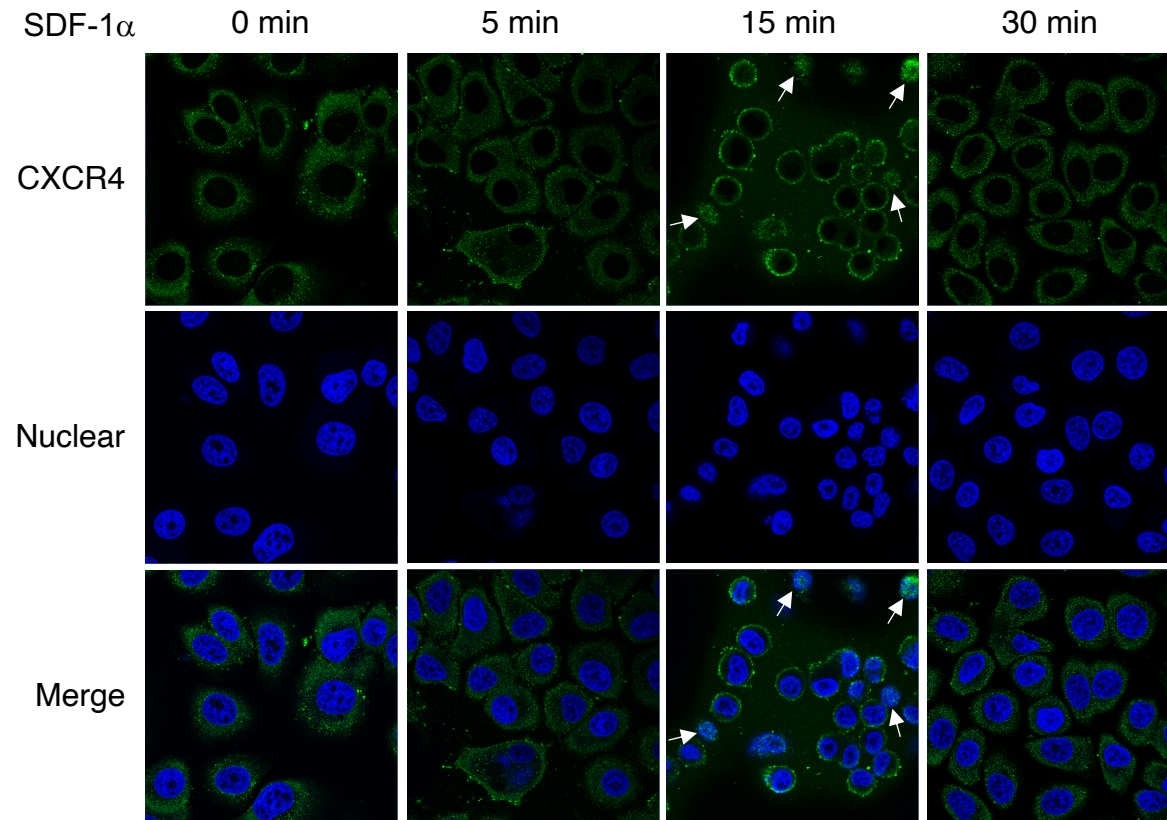

**Fig. S6. Translocation of CXCR4 and changes of cell morphology induced by SDF-1 $\alpha$ .** SKRT cells were grown on coverslips. After serum starvation overnight, the cells received stimulation with SDF-1 $\alpha$  (100 ng/ml) for the times indicated and were fixed and permeabilized. CXCR4 was detected with mouse anti-human CXCR4 primary antibody (R&D, Minneapolis, MN) and the Alexa Fluor 488-conjugated goat anti-mouse secondary antibody (green). Nuclei were stained with DAPI (blue). Microscopic images were captured by a multiphoton confocal laser-scanning microscope (Materials and Methods). Arrows indicate CXCR4 nuclear translocation.
