# Supplementary figures and images for: Targeting CXCR4 abrogates resistance to trastuzumab by blocking cell cycle progression and synergizes with docetaxel in breast cancer treatment
Source: Research Square preprint supplement (doi:10.21203/rs.3.rs-2388864/v1), 2023-02-14

**For Figure 1A**

CXCR4

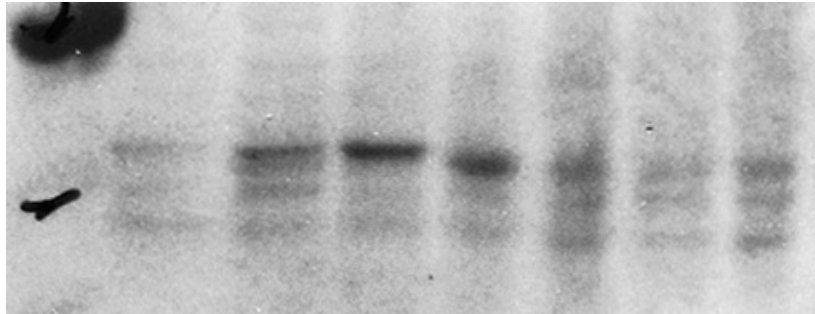

Actin

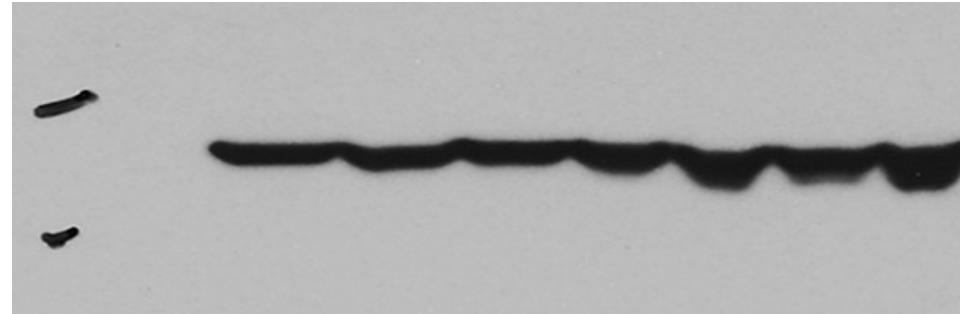

For Figure 2A

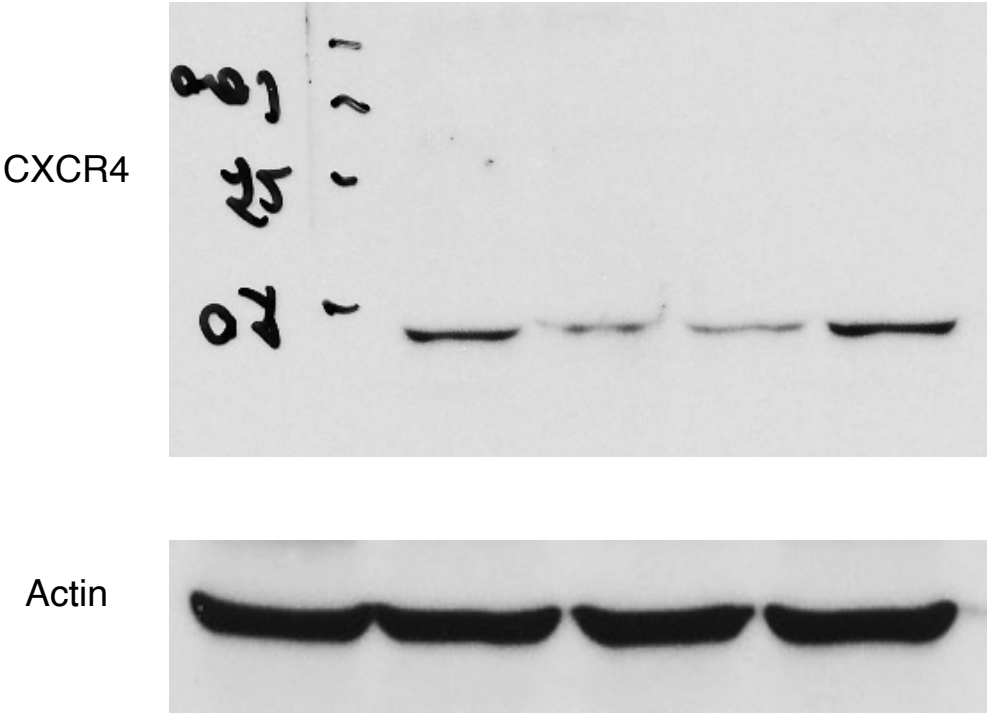

**For Figure 3C**

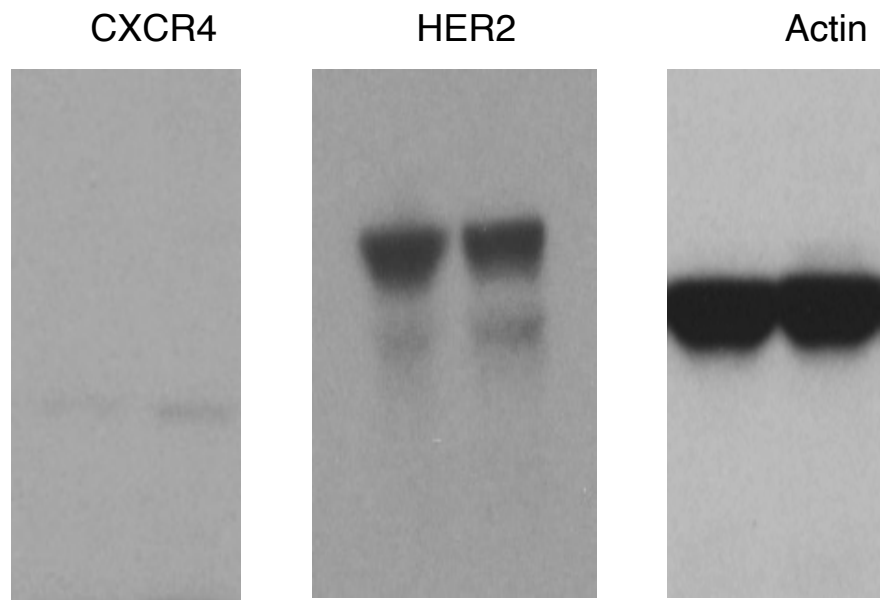

**For Figure 3E**

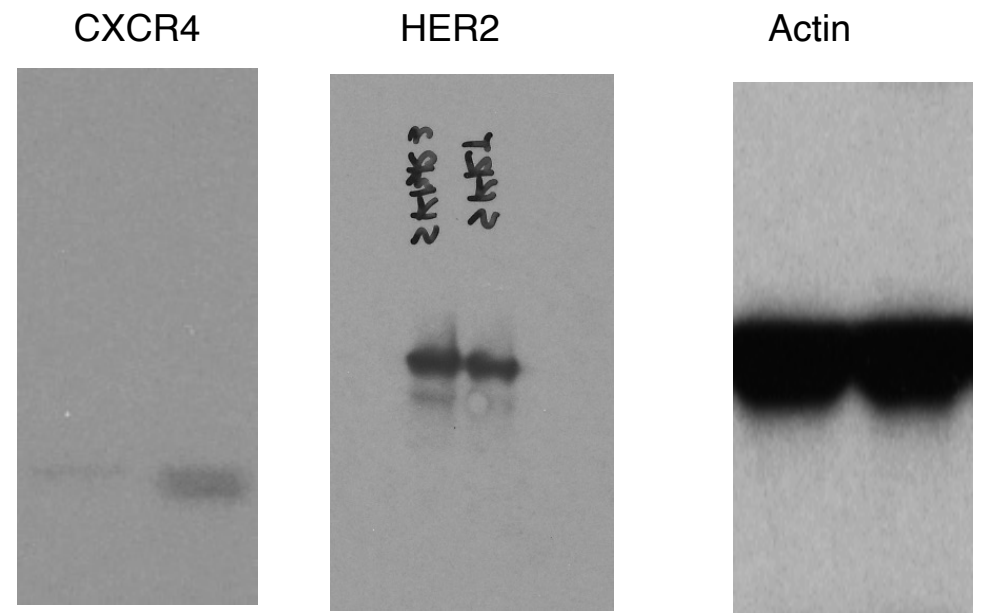

For Fig. 5B and Fig.S5

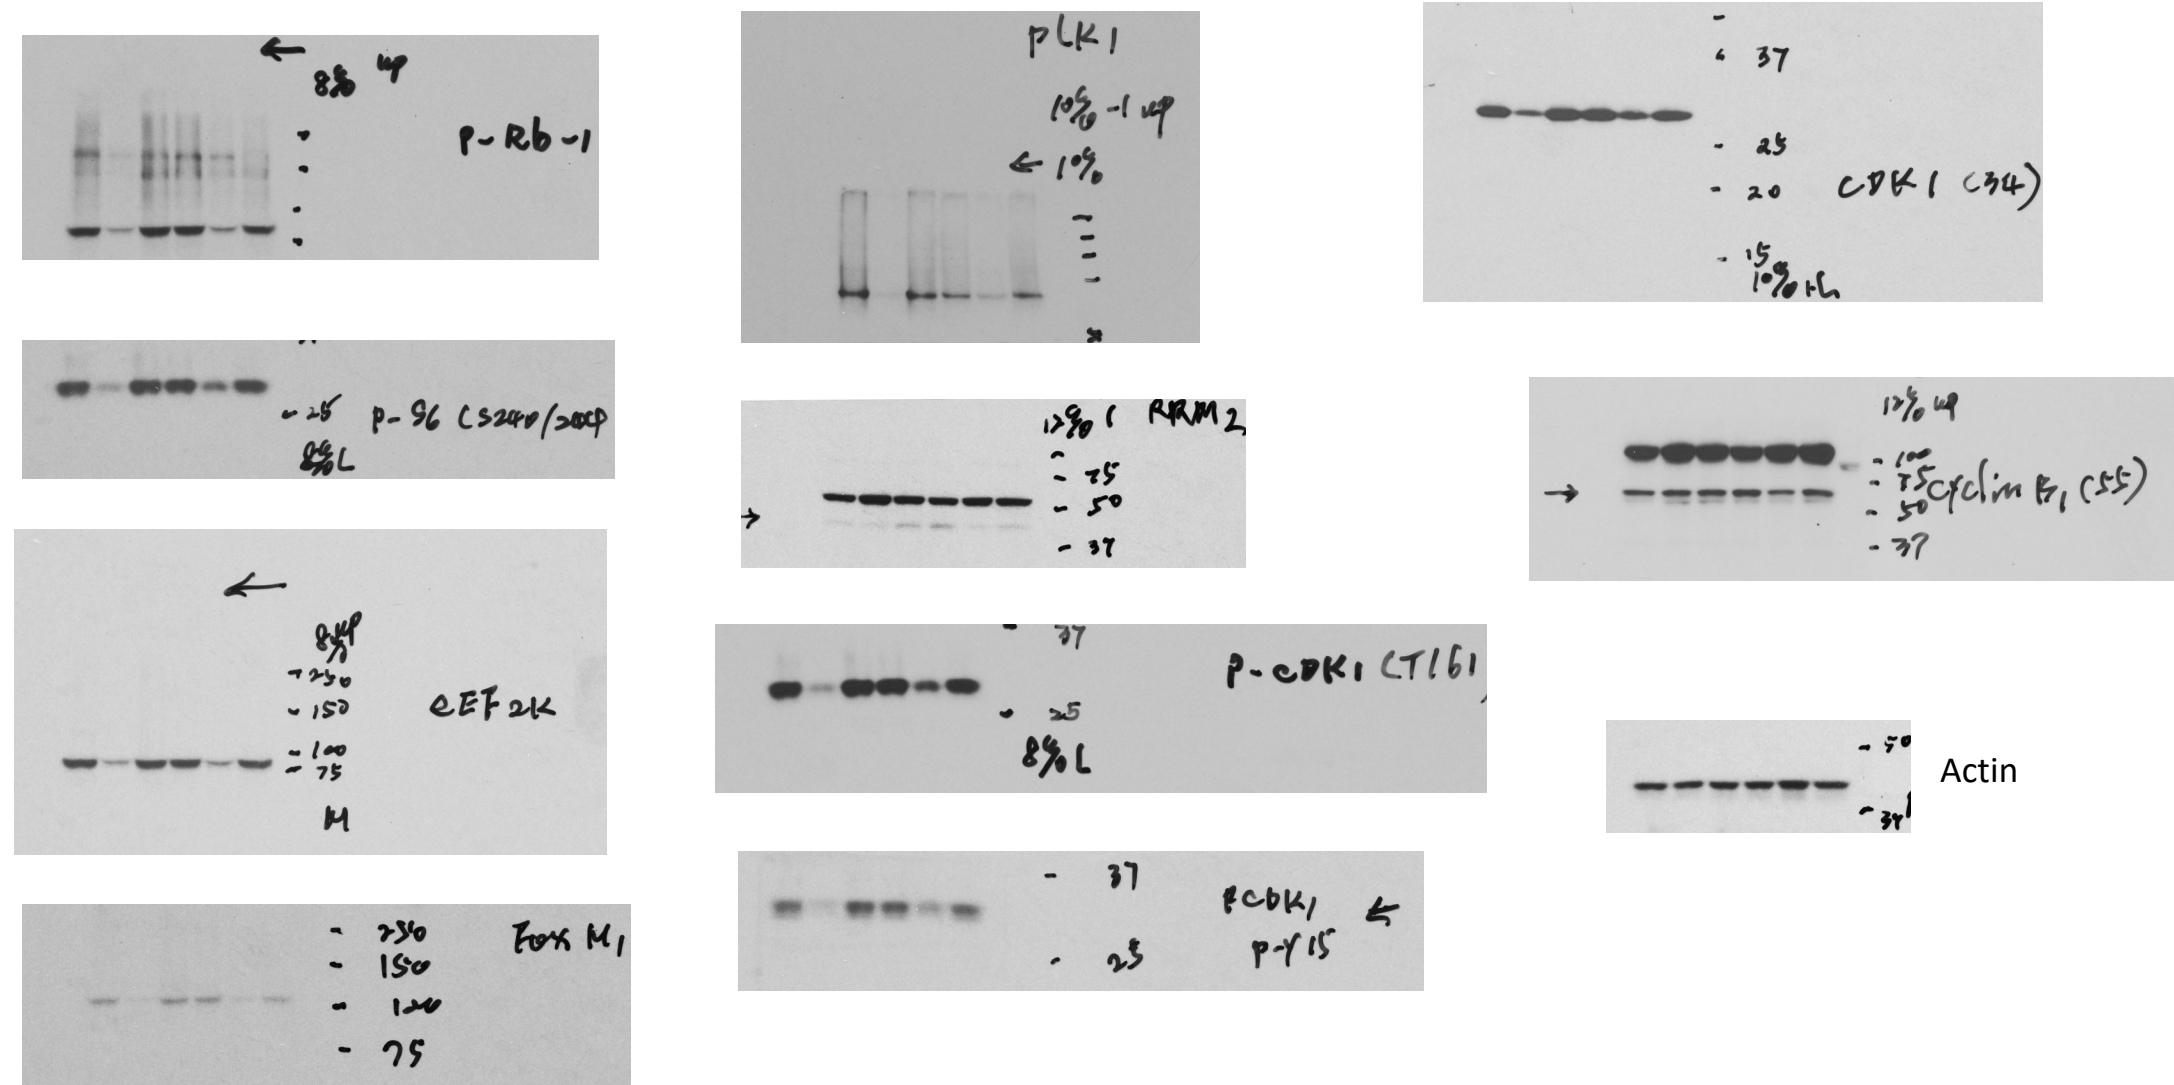

Supplement: Supplementary file 6 [file d1c65833caf617836a3759c4.pdf]

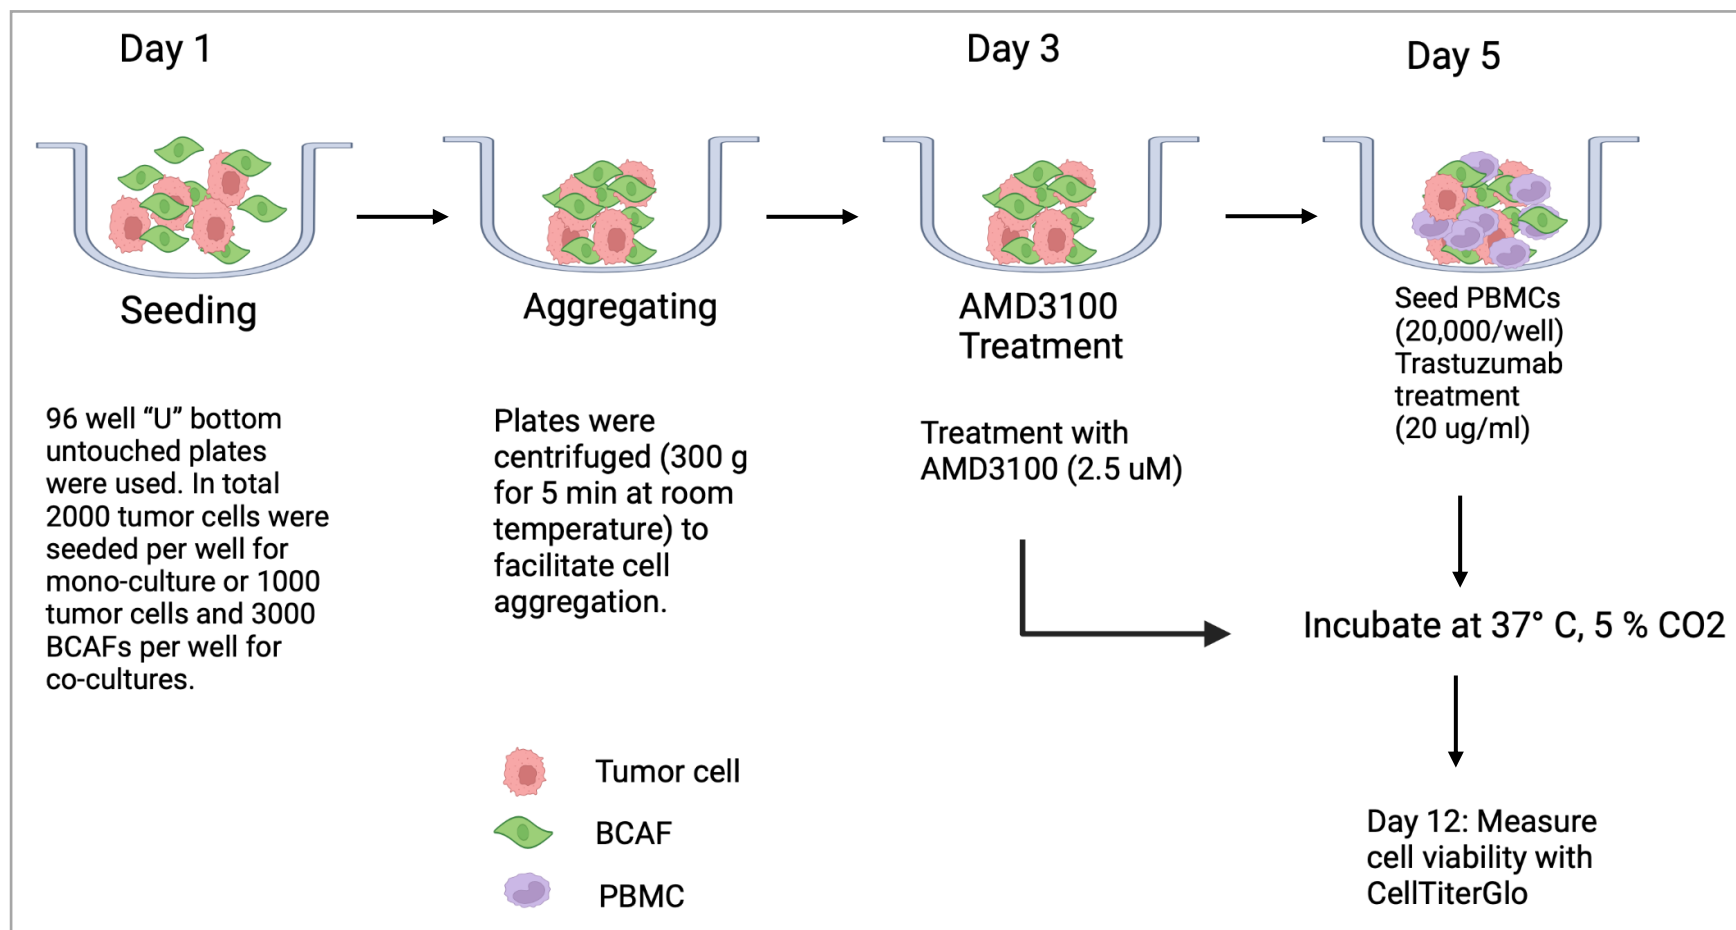

Figure S1. Illustration of 3D co-culture

Supplement: Supplementary file 7 [file e537dfce27d6359107f88fe0.pdf]
